# Supplementary material for: Neuroprotective Potential of Tamarillo (Cyphomandra betacea) Epicarp Extracts Obtained by Sustainable Extraction Process
Source: PubMed Central journal article supplement (PMC8634709; doi:10.3389/fnut.2021.769617), 2021-11-15
Supplement: Data_Sheet_1.pdf [file Data_Sheet_1.pdf]

## Supplementary Material

**Table S1** ANOVA for response surface modeling showing linear, quadratic and interaction relations of each response variable and coefficients of regression equation for model prediction.

| Response variable             | Factor            | DF            | SS | <i>F</i> -value | <i>p</i> -value |               | CE                     |
|-------------------------------|-------------------|---------------|----|-----------------|-----------------|---------------|------------------------|
| Extraction yield (%)          | Model             | 3893.869      | 8  | <b>15.420</b>   | <b>0.024*</b>   | $\beta_0$     | 38.61                  |
|                               | SC (% EtOH)       | 2343.536      | 1  | <b>48.199</b>   | <b>0.006*</b>   | $\beta_1$     | -0.06                  |
|                               | SC $\times$ SC    | 114.005       | 1  | <b>2.345</b>    | <b>0.223</b>    | $\beta_{1,1}$ | 0.00                   |
|                               | T ( $^{\circ}$ C) | 1275.750      | 1  | <b>26.238</b>   | <b>0.014*</b>   | $\beta_2$     | 0.09                   |
|                               | T $\times$ T      | 11.956        | 1  | <b>0.246</b>    | <b>0.654</b>    | $\beta_{2,2}$ | $6.79 \times 10^{-4}$  |
|                               | SC $\times$ T     | 2.756         | 1  | <b>0.057</b>    | <b>0.827</b>    | $\beta_{1,2}$ | $-2.77 \times 10^{-4}$ |
|                               | Error             | 145.866       | 3  |                 |                 |               |                        |
|                               |                   | $R^2 = 0.963$ |    |                 |                 |               |                        |
| TPC (mg GAE/g)                | Model             | 4934.783      | 8  | <b>5.500</b>    | <b>0.096</b>    | $\beta_0$     | 22.20                  |
|                               | SC (% EtOH)       | 1928.803      | 1  | <b>11.924</b>   | <b>0.041*</b>   | $\beta_1$     | -0.23                  |
|                               | SC $\times$ SC    | 252.803       | 1  | <b>1.563</b>    | <b>0.300</b>    | $\beta_{1,1}$ | $4.50 \times 10^{-3}$  |
|                               | T ( $^{\circ}$ C) | 2145.048      | 1  | <b>13.261</b>   | <b>0.036*</b>   | $\beta_2$     | -0.15                  |
|                               | T $\times$ T      | 73.706        | 1  | <b>0.456</b>    | <b>0.548</b>    | $\beta_{2,2}$ | $1.69 \times 10^{-3}$  |
|                               | SC $\times$ T     | 49.151        | 1  | <b>0.304</b>    | <b>0.620</b>    | $\beta_{1,2}$ | $1.17 \times 10^{-3}$  |
|                               | Error             | 485.271       | 3  |                 |                 |               |                        |
|                               |                   | $R^2 = 0.902$ |    |                 |                 |               |                        |
| TFC (mg Q/g)                  | Model             | 18.505        | 8  | <b>20.530</b>   | <b>0.016*</b>   | $\beta_0$     | 1.29                   |
|                               | SC (% EtOH)       | 6.592         | 1  | <b>37.635</b>   | <b>0.009*</b>   | $\beta_1$     | $-1.63 \times 10^{-2}$ |
|                               | SC $\times$ SC    | 3.175         | 1  | <b>18.129</b>   | <b>0.024*</b>   | $\beta_{1,1}$ | $5.04 \times 10^{-4}$  |
|                               | T ( $^{\circ}$ C) | 6.448         | 1  | <b>36.811</b>   | <b>0.009*</b>   | $\beta_2$     | $-3.17 \times 10^{-2}$ |
|                               | T $\times$ T      | 1.334         | 1  | <b>7.618</b>    | <b>0.070</b>    | $\beta_{2,2}$ | $2.27 \times 10^{-4}$  |
|                               | SC $\times$ T     | 0.431         | 1  | <b>2.458</b>    | <b>0.215</b>    | $\beta_{1,2}$ | $-1.09 \times 10^{-4}$ |
|                               | Error             | 0.525         | 3  |                 |                 |               |                        |
|                               |                   | $R^2 = 0.972$ |    |                 |                 |               |                        |
| TCC (mg CE/g)                 | Model             | 11348.465     | 8  | <b>18.810</b>   | <b>0.018*</b>   | $\beta_0$     | 77.99                  |
|                               | SC (% EtOH)       | 6323.806      | 1  | <b>54.080</b>   | <b>0.005*</b>   | $\beta_1$     | -0.56                  |
|                               | SC $\times$ SC    | 2386.044      | 1  | <b>20.405</b>   | <b>0.020*</b>   | $\beta_{1,1}$ | 1.38E-02               |
|                               | T ( $^{\circ}$ C) | 770.379       | 1  | <b>6.588</b>    | <b>0.083</b>    | $\beta_2$     | -1.53                  |
|                               | T $\times$ T      | 1446.017      | 1  | <b>12.366</b>   | <b>0.039*</b>   | $\beta_{2,2}$ | 7.47E-03               |
|                               | SC $\times$ T     | 71.413        | 1  | <b>0.611</b>    | <b>0.492</b>    | $\beta_{1,2}$ | -1.41E-03              |
|                               | Error             | 350.806       | 3  |                 |                 |               |                        |
|                               |                   | $R^2 = 0.969$ |    |                 |                 |               |                        |
| ABTS (IC <sub>50</sub> mg/mL) | Model             | 151.932       | 8  | <b>27.610</b>   | <b>0.010*</b>   | $\beta_0$     | 8.17                   |
|                               | SC (% EtOH)       | 4.084         | 1  | <b>3.791</b>    | <b>0.147</b>    | $\beta_1$     | $9.10 \times 10^{-3}$  |
|                               | SC $\times$ SC    | 2.622         | 1  | <b>2.434</b>    | <b>0.217</b>    | $\beta_{1,1}$ | $-4.58 \times 10^{-4}$ |
|                               | T ( $^{\circ}$ C) | 107.273       | 1  | <b>99.590</b>   | <b>0.002*</b>   | $\beta_2$     | 0.19                   |
|                               | T $\times$ T      | 33.702        | 1  | <b>31.288</b>   | <b>0.011*</b>   | $\beta_{2,2}$ | $-1.14 \times 10^{-3}$ |
|                               | SC $\times$ T     | 1.020         | 1  | <b>0.947</b>    | <b>0.402</b>    | $\beta_{1,2}$ | $1.68 \times 10^{-4}$  |
|                               | Error             | 3.231         | 3  |                 |                 |               |                        |
|                               |                   | $R^2 = 0.979$ |    |                 |                 |               |                        |
| LOX (IC <sub>50</sub> mg/mL)  | Model             | 22088.054     | 8  | <b>2.890</b>    | <b>0.206</b>    | $\beta_0$     | 40.23                  |
|                               | SC (% EtOH)       | 4651.507      | 1  | <b>3.672</b>    | <b>0.151</b>    | $\beta_1$     | 2.48                   |
|                               | SC $\times$ SC    | 1569.867      | 1  | <b>1.239</b>    | <b>0.347</b>    | $\beta_{1,1}$ | $-1.12 \times 10^{-2}$ |
|                               | T ( $^{\circ}$ C) | 9748.570      | 1  | <b>7.695</b>    | <b>0.069</b>    | $\beta_2$     | 0.92                   |
|                               | T $\times$ T      | 713.790       | 1  | <b>0.563</b>    | <b>0.507</b>    | $\beta_{2,2}$ | $-5.25 \times 10^{-3}$ |
|                               | SC $\times$ T     | 1603.602      | 1  | <b>1.266</b>    | <b>0.342</b>    | $\beta_{1,2}$ | $-6.67 \times 10^{-3}$ |
|                               | Error             | 3800.717      | 3  |                 |                 |               |                        |
|                               |                   | $R^2 = 0.828$ |    |                 |                 |               |                        |
| ACHE (IC <sub>50</sub> mg/mL) | Model             | 41607.445     | 8  | <b>20.650</b>   | <b>0.016*</b>   | $\beta_0$     | 203.83                 |
|                               | SC (% EtOH)       | 4274.824      | 1  | <b>10.917</b>   | <b>0.046*</b>   | $\beta_1$     | -0.73                  |
|                               | SC $\times$ SC    | 37.109        | 1  | <b>0.095</b>    | <b>0.778</b>    | $\beta_{1,1}$ | $-1.72 \times 10^{-3}$ |

|               |           |   |        |        |               |                        |
|---------------|-----------|---|--------|--------|---------------|------------------------|
| T (°C)        | 28917.528 | 1 | 73.848 | 0.003* | $\beta_2$     | 2.59                   |
| T × T         | 6862.133  | 1 | 17.524 | 0.025* | $\beta_{2,2}$ | $-1.63 \times 10^{-2}$ |
| SC × T        | 341.110   | 1 | 0.871  | 0.419  | $\beta_{1,2}$ | $3.08 \times 10^{-3}$  |
| Error         | 1174.742  | 3 |        |        |               |                        |
| $R^2 = 0.972$ |           |   |        |        |               |                        |

DF: Degree of freedom; CE: Coefficients of regression equation (Uncoded units); SS: Sum of squares;  
 \*Significant.

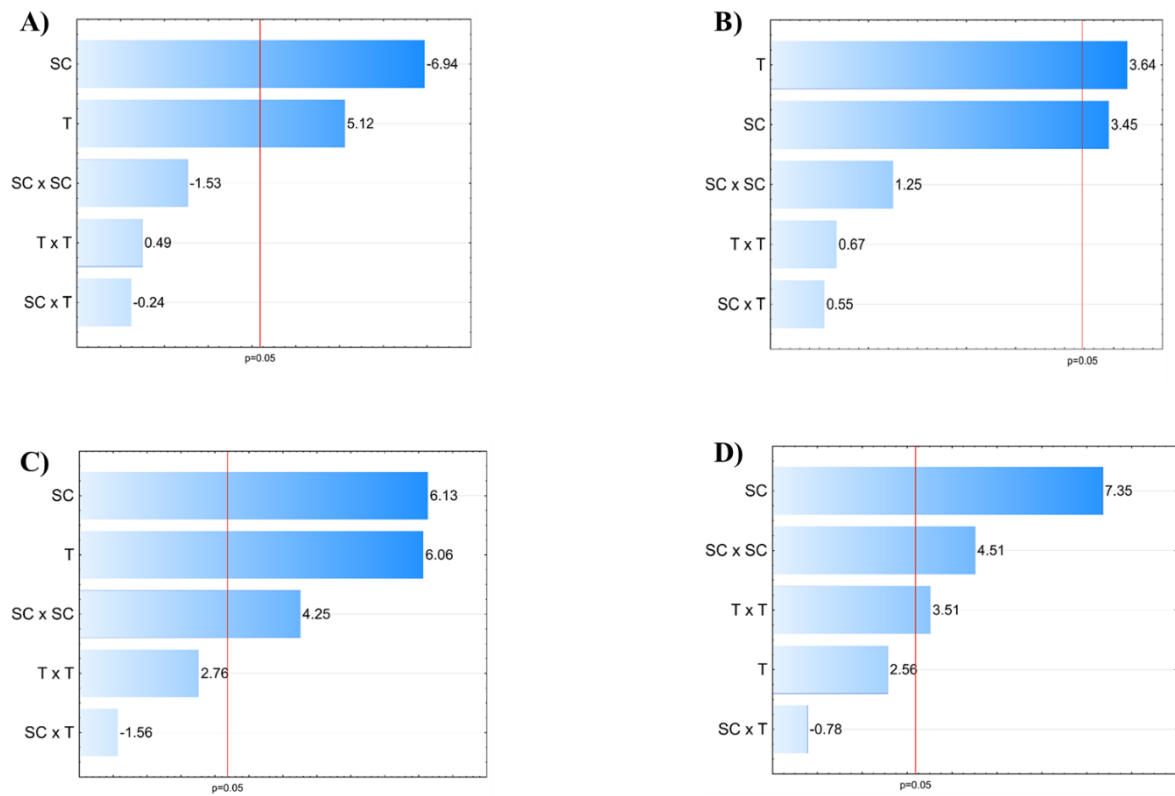

**Figure S1** Pareto diagram for effect of solvent composition and temperature in A) total yield, B) TPC, C) TFC and D) TCC of tamarillo epicarp obtained by PLE.

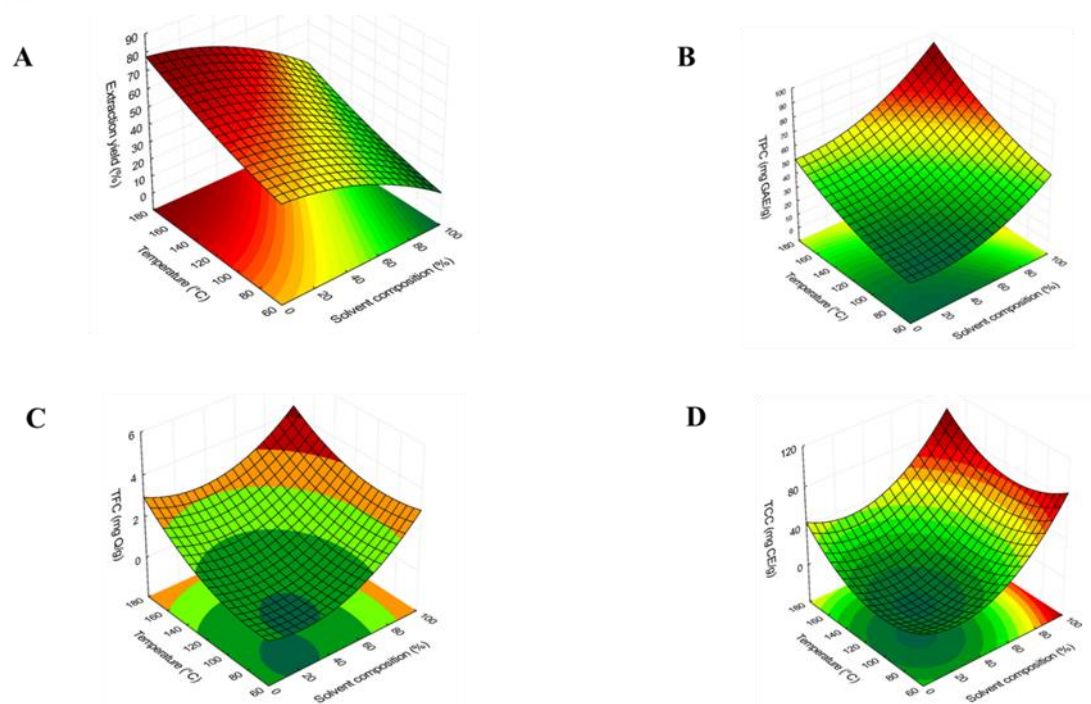

**Figure S2** Response surface plot for (A) Extraction Yield (%); (B) TPC; (C) TFC and (D) TCC.

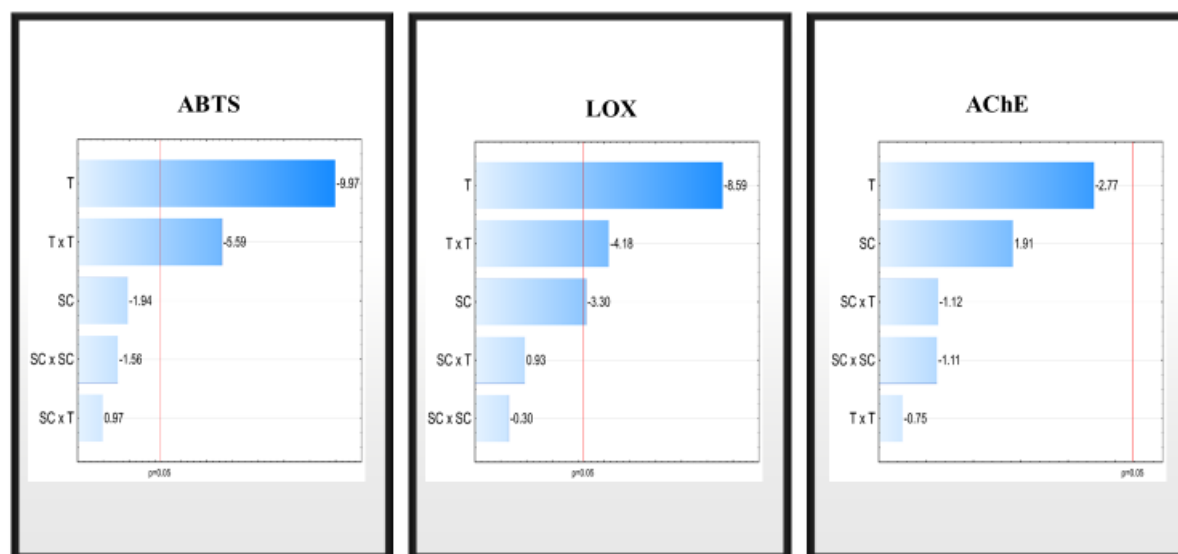

**Figure S3** Pareto diagram for effect of solvent composition and temperature in antioxidant activity by ABTS, anti-inflammatory activity by LOX and acetylcholinesterase inhibition enzyme AChE of tamarillo epicarp obtained by PLE.

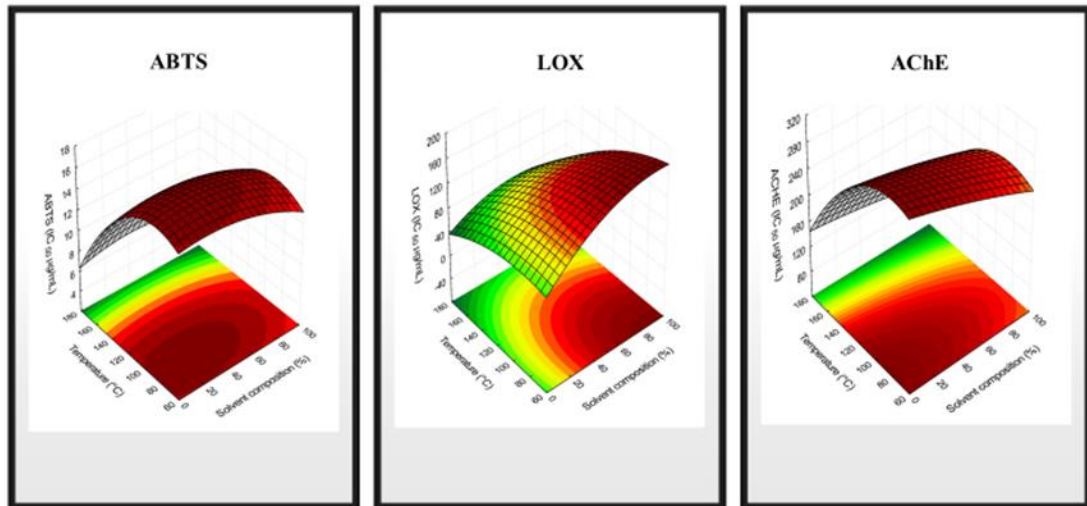

**Figure S4** Response surface for biological activities of tamarillo epicarp extracts (ABTS, LOX and AChE) as a function of temperature and solvent composition.
